# Supplementary material for: Simple, robust and large-scale fabrication of superhydrophobic surfaces based on silica/polymer composites
Source: Royal Society of Chemistry journal article supplement (doi:10.1039/c3ra44502j), 2013-01-01
Supplement: c3ra44502j.pdf [file c3ra44502j.pdf]

## Electronic Supplementary Information (ESI)

# Simple, robust and large-scale fabrication of superhydrophobic surfaces based on polymer/silica composites

**Xinde Tang,<sup>\*a</sup> Tieshi Wang,<sup>b</sup> Faqi Yu<sup>b</sup>, Xiao Zhang,<sup>a</sup> Qiangqiang  
Zhu,<sup>a</sup> Laixue Pang,<sup>a</sup> Guangyou Zhang,<sup>b</sup> and Meishan Pei<sup>\*b</sup>**

*<sup>1</sup>School of Material Science and Engineering, Shandong Jiaotong University, Jinan  
250023, China*

*<sup>2</sup>School of Chemistry and Chemical Engineering, University of Jinan, Jinan 250022,  
China*

## Experimental details

### *Preparation of acrylate copolymer*

Following the previously reported procedure in Ref. 1. In a 100 mL three-necked round-bottomed flask was placed styrene (3.0 g), *n*-butyl methacrylate (15 g), glycidyl methacrylate (4.5 g), and toluene (40 mL). Under nitrogen stream protection, the flask was immersed in an oil bath maintained at 85 °C, and the mixture was stirred for 40 min. Azobisisobutyronitrile (AIBN, 0.2 g) in 5 mL of toluene was placed in the dropping funnel and added dropwise over 15 min to the mixture, then the mixture was stirred for another 3 h. The resulting mixture was precipitated in excess petroleum ether (b.p. 60-90 °C), and dried in a vacuum, resulting in acrylate copolymer as a colorless and transparent solid. The synthetic route was shown in Fig. S1.

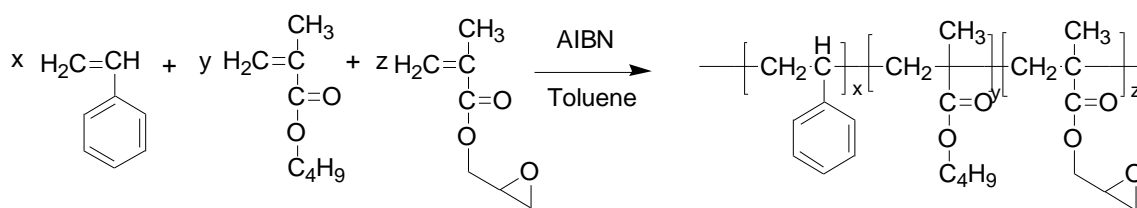

Fig. S1 Synthetic route of acrylate copolymer

### *Preparation of silica/epoxy composites*

10 mL of toluene/acetone mixture (v/v = 2:1), 1.0 g of silica nanoparticle with the size of 50-100 nm, 1.0 g of epoxy resin, and 0.5 g of curing agent, with an silica/epoxy/curing agent weight ratio of 1:1:0.5 (the weight ratio of epoxy/curing agent was fixed as 2:1), were mixed by

ultrasonication. Following this process, silica/epoxy/curing agent mixed samples with weight ratio of 2:1:0.5, 4:1:0.5, 6:1:0.5, and 8:1:0.5 were respectively achieved. For comparative purpose, a sample without silica was also prepared.

### ***Preparation of silica/acrylate copolymer composites***

A process similar to the silica/epoxy composites was conducted for the preparation of silica/acrylate copolymer composites.

### ***Brush-coating process***

The obtained composite samples were coated on the glass slide by brush coating method and placed horizontally, then dried at room temperature overnight to allow solvent to evaporate from the films.

The resultant coating appeared ivory-white, flat, and smooth, and without any obvious protrusions.

### ***Sand abrasion test***

Following the procedure reported in Ref. 2. A sand abrasion test was performed on the apparatus as shown in Fig. S2. Sand grains with diameter of  $\sim 200 \mu\text{m}$  impinged the surface from a height of 15 cm. After sand abrasion for 5 min, the wettability of the surface was recharacterized.

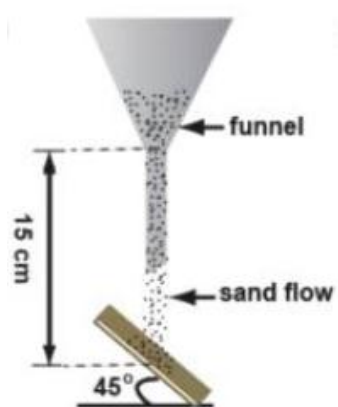

Fig. S2 The apparatus for a sand abrasion test

### Characterization

The surface morphology were analyzed using a JSM-6510LV scanning electron microscope (SEM) for morphological observations. The wettability of the as-prepared surfaces were determined by measuring the surface contact angles made by droplets of deionized water. Measurements were performed using an OCA40 contact angle goniometer (Dataphysics, Germany) and the values reported were the average of three drops for each sample at different positions.

**Table S1.** Samples of silica/epoxy composites with different weight ratio, and water contact angles of the resulting surfaces.

| Sample | Weight ratio of silica/epoxy | Water contact angle (degree)            |
|--------|------------------------------|-----------------------------------------|
| 1      | 0:1                          | 103.8 ± 2.1                             |
| 2      | 1:1                          | 147.3 ± 0.2                             |
| 3      | 2:1                          | 144.2 ± 1.3                             |
| 4      | 4:1                          | 143.4 ± 3.6                             |
| 5      | 6:1                          | 150.3 ± 2.1 (147.0 ± 1.5 <sup>a</sup> ) |
| 6      | 8:1                          | 147.2 ± 1.1                             |

<sup>a</sup> Determined after a sand abrasion test.

**Table S2.** Samples of silica/acrylate copolymer composites with different weight ratio, and water contact angles of the resulting surfaces.

| Sample | Weight ratio of silica/acrylate copolymer | Water contact angle (degree)            |
|--------|-------------------------------------------|-----------------------------------------|
| 1      | 0:1                                       | 79.3 ± 4.4                              |
| 2      | 1:1                                       | 133.4 ± 0.2                             |
| 3      | 2:1                                       | 149.7 ± 0.5                             |
| 4      | 4:1                                       | 154.6 ± 1.5 (151.1 ± 1.2 <sup>a</sup> ) |

|          |            |                    |
|----------|------------|--------------------|
| <b>5</b> | <b>6:1</b> | <b>151.9 ± 1.1</b> |
| <b>6</b> | <b>8:1</b> | <b>152.4 ± 0.2</b> |

<sup>a</sup> Determined after a sand abrasion test.

## References

1. L. Cao, A. K. Joes, V. K. Sikka, J. Wu and D. Gao, *Langmuir*, 2009, **25**, 12444.
2. L. P. Xu, J. Peng, Y. Liu, Y. Wen, X. Zhang, L. Jiang and S. Wang, *ACS Nano*, 2013, **7**, 5077.
